# Supplementary material for: Alginate–Gelatin Self-Healing Hydrogel Produced via Static–Dynamic Crosslinking
Source: MDPI journal article supplement (doi:10.3390/molecules28062851), 2023-03-22
Supplement: s1 [file s1]

## Supporting Information

**NMR.** In Figure S1 were reported the  $^1\text{H}$ -NMR spectra of Tyramine and 3-APBA. The peaks related to the aromatic protons of 3-APBA were identified in a range between  $\delta=7$ -7,4 ppm [1] while the aromatic protons in orto position respect to the hydroxyl group peaks of Tyramine were visible  $\delta=6,8$  and the protons in meta position at  $\delta=7,1$  ppm [2]. Moreover, the protons of  $-\text{CH}_2$  chain of Tyramine are visible between  $\delta=2,7$ -3,0 ppm.

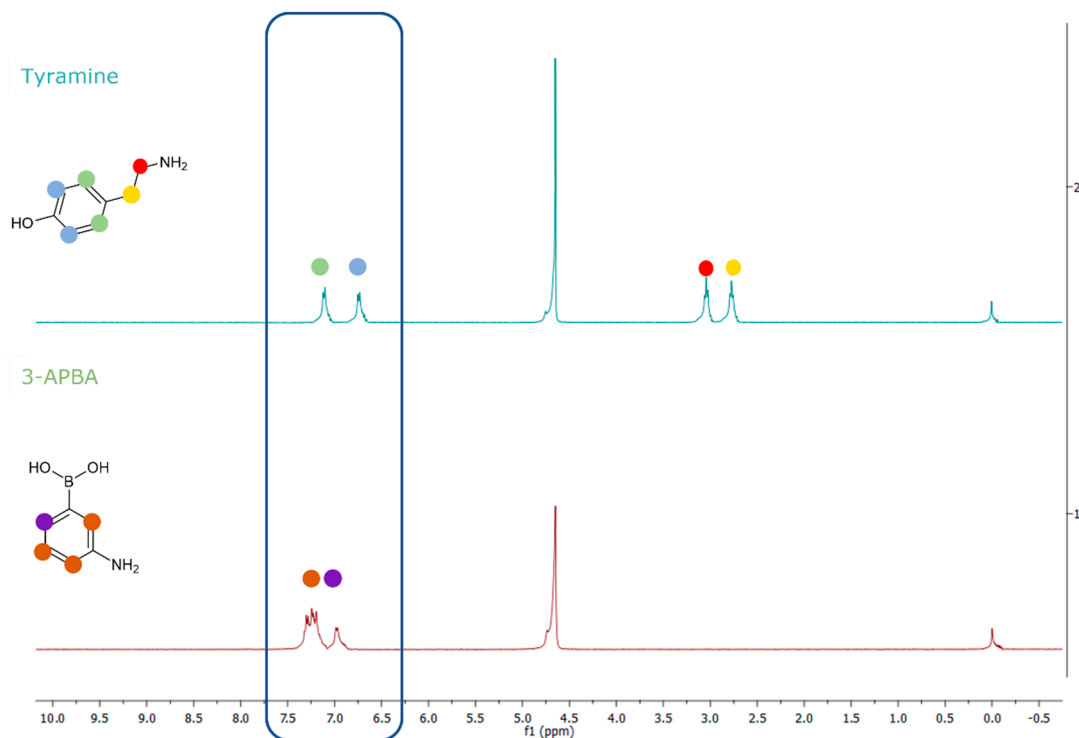

**Figure S1.**  $^1\text{H}$ -NMR of Tyramine and 3-APBA.

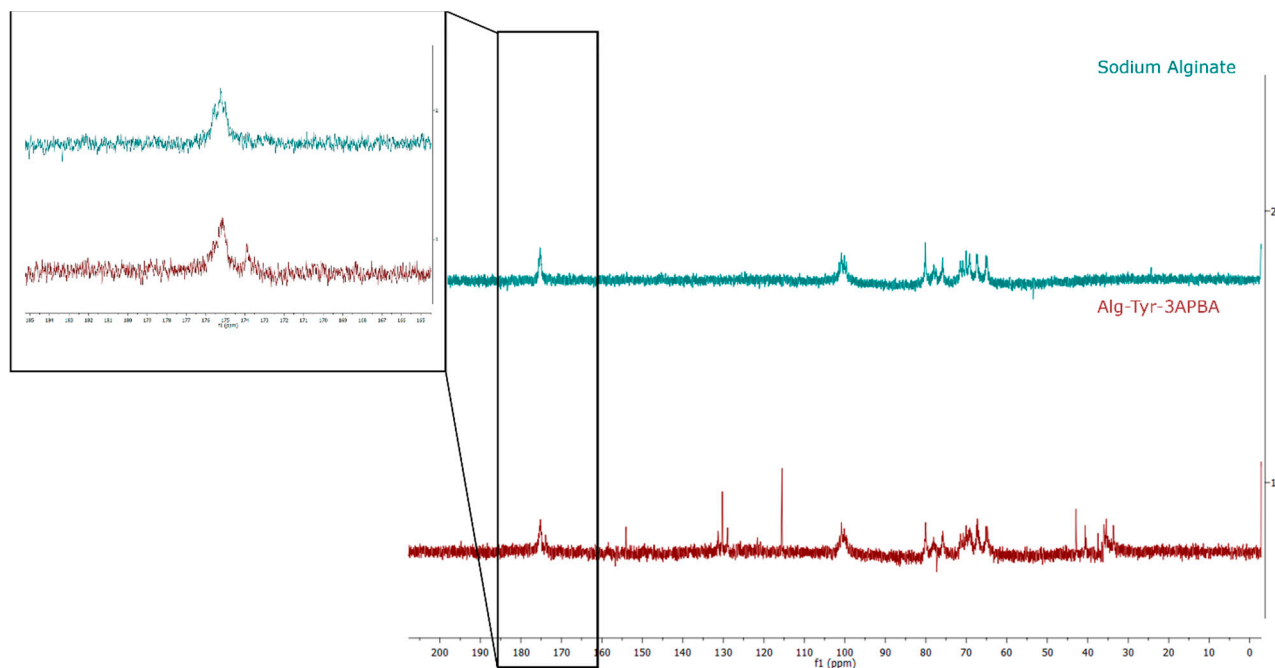

**Figure S2.**  $^{13}\text{C}$ -NMR of Sodium Alginate and Alg-Tyr-3APBA.

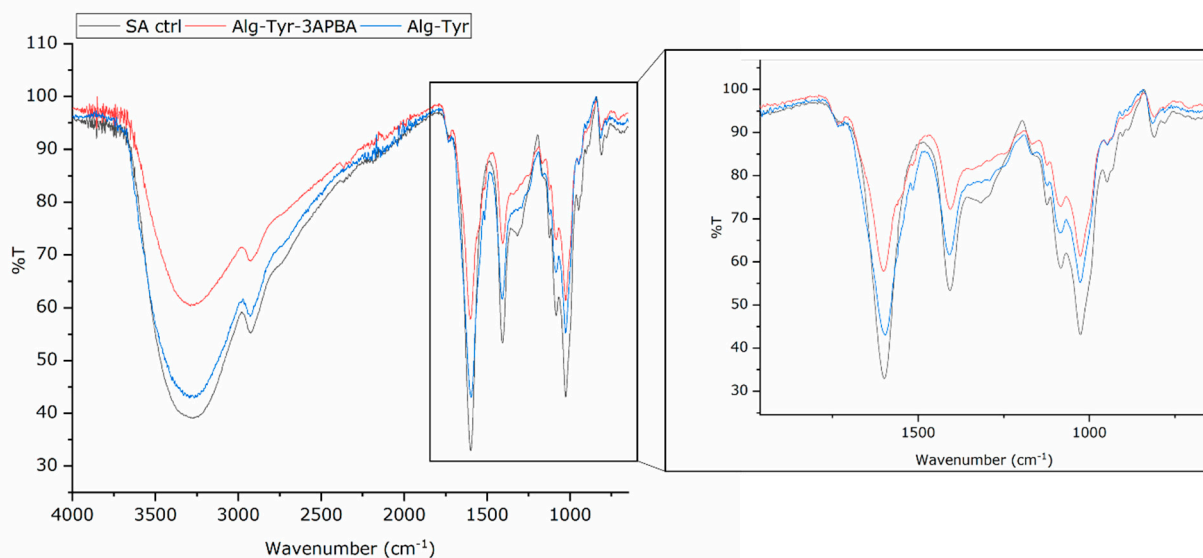

**Figure S3.** FT-IR spectra of sodium alginate, Alg-Tyr-3APBA, Alg-Tyr

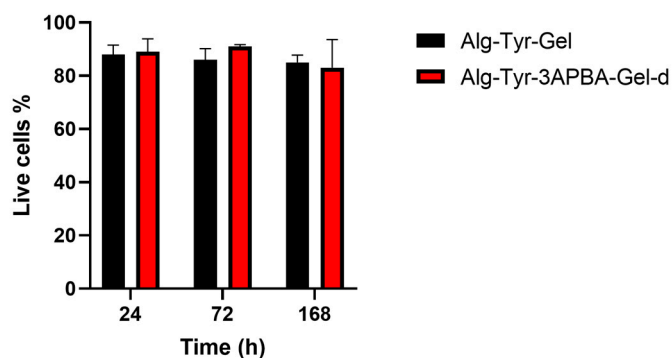

**Figure S4.** Quantification of living cells detected by Live-Dead assay at day 1, day 3 and day 7 on hydrogels Alg-Tyr-3APBA-Gel-d (red) and Alg-Tyr-Gel (black).

## Reference

1. Hong, S.H.; Kim, S.; Park, J.P.; Shin, M.; Kim, K.; Ryu, J.H.; Lee, H. Dynamic Bonds between Boronic Acid and Alginate: Hydrogels with Stretchable, Self-Healing, Stimuli-Responsive, Remoldable, and Adhesive Properties. *Biomacromolecules* **2018**, *19*, 2053–2061, doi:10.1021/ACS.BIOMAC.8B00144.
2. Schulz, A.; Gepp, M.M.; Stracke, F.; von Briesen, H.; Neubauer, J.C.; Zimmermann, H. Tyramine-Conjugated Alginate Hydrogels as a Platform for Bioactive Scaffolds. *J. Biomed. Mater. Res. A* **2019**, *107*, 114–121, doi:10.1002/JBM.A.36538.
